# Supplementary material for: Postnatal activation of TLR4 in astrocytes promotes excitatory synaptogenesis in hippocampal neurons
Source: PubMed Central journal article supplement — J Cell Biol. 2016 Dec 5;215(5):719–34. doi: 10.1083/jcb.201605046 (PMC5147000; doi:10.1083/jcb.201605046), 2016-12-05
Supplement: JCB_201605046_sm.pdf [file JCB_201605046_sm.pdf]

Shen et al., <https://doi.org/10.1083/jcb.201605046>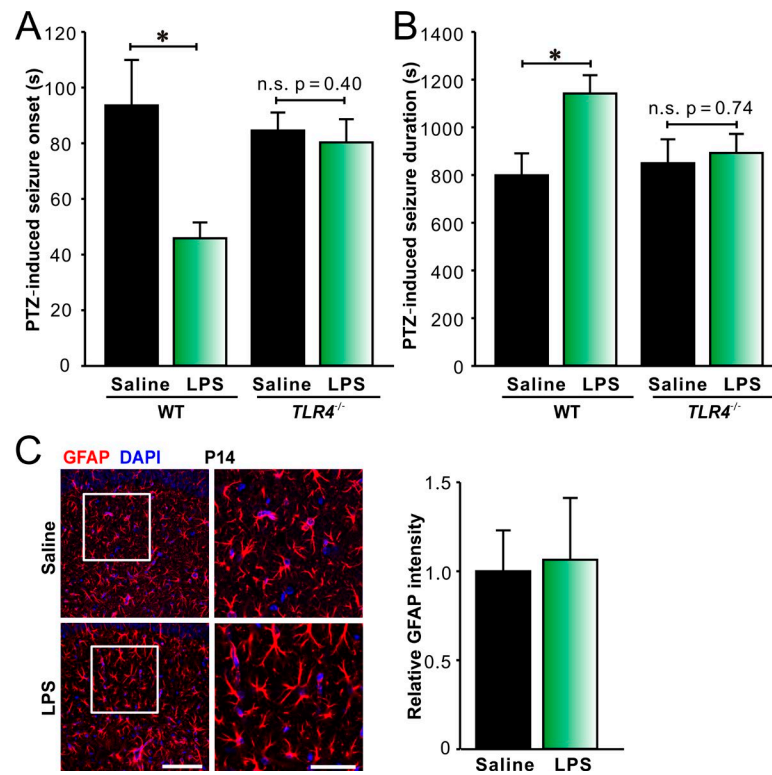

Figure S1. **The effects of LPS on PTZ-induced seizure susceptibility and astrocyte activation are attenuated in *TLR4*<sup>-/-</sup> mice during a critical developmental period.** Histograms showing LPS challenges on PTZ-induced seizure onset (A) and duration (B) in *TLR4*<sup>-/-</sup> and WT littermate mice.  $n = 7$  and  $10$  for WT and *TLR4*<sup>-/-</sup> groups, respectively. (C) Representative images of immunohistostaining of GFAP (red) and DAPI (blue) in hippocampal CA1 area of 2-wk-old *TLR4*<sup>-/-</sup> mice treated with saline or LPS (left) and quantification of relative intensity (right) of GFAP. Bars: (left)  $100\ \mu\text{m}$ ; (right)  $50\ \mu\text{m}$ .  $n = 10$  for each group. \*,  $P < 0.05$  ( $t$  test). Data are mean  $\pm$  SEM.

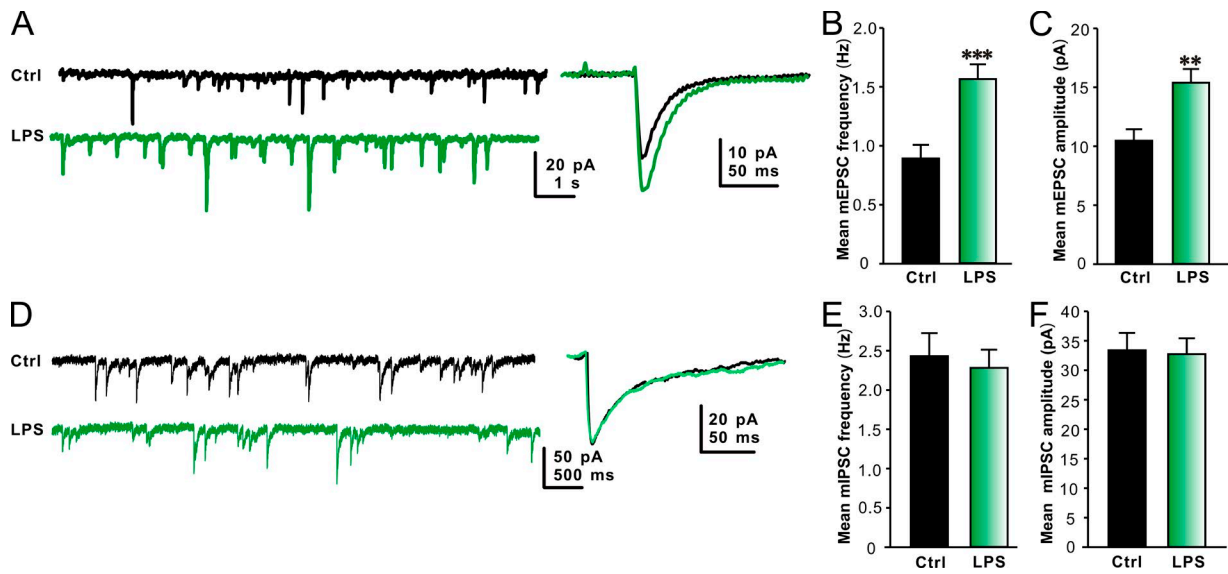

Figure S2. **Effect of LPS on mEPSCs and mIPSCs in hippocampal neurons co-cultured with astrocytes.** LPS was added at DIV13 to -14, and recordings were done at DIV15. (A) Representative traces of mEPSCs recorded from neurons in co-cultures. Histograms showing LPS increased mEPSC frequency (B) and amplitude (C) in co-cultured neurons.  $n = 10$  for each group. (D) Representative traces of mIPSCs recorded from neurons in co-cultures. Histograms showing LPS did not change mIPSC frequency (E) and amplitude (F) in neurons co-cultured with astrocytes.  $n = 9$  for each group. \*\*,  $P < 0.01$ ; \*\*\*,  $P < 0.001$  (*t* test). Data are mean  $\pm$  SEM.

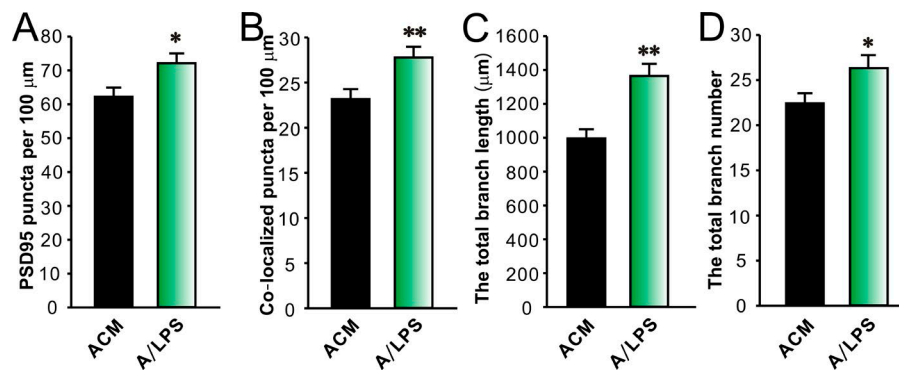

Figure S3. **A/LPS promotes synaptogenesis and dendritic branching in cultured hippocampal neurons.** Neurons at DIV4 to -5 were cultured with ACM. Half of the medium was replaced at DIV8 with fresh ACM. At DIV13, half of the medium was replaced with A/LPS or ACM. Immunocyto stainings were done at DIV15. Histograms showing A/LPS increased PSD95 puncta (A) and PSD95/synaptophysin colocalized puncta (B) in cultured neurons. Histograms showing A/LPS increased the total length (C) and number (D) of dendritic branches.  $n = 30$  for each group. \*,  $P < 0.05$ ; \*\*,  $P < 0.01$  (*t* test). Data are mean  $\pm$  SEM.

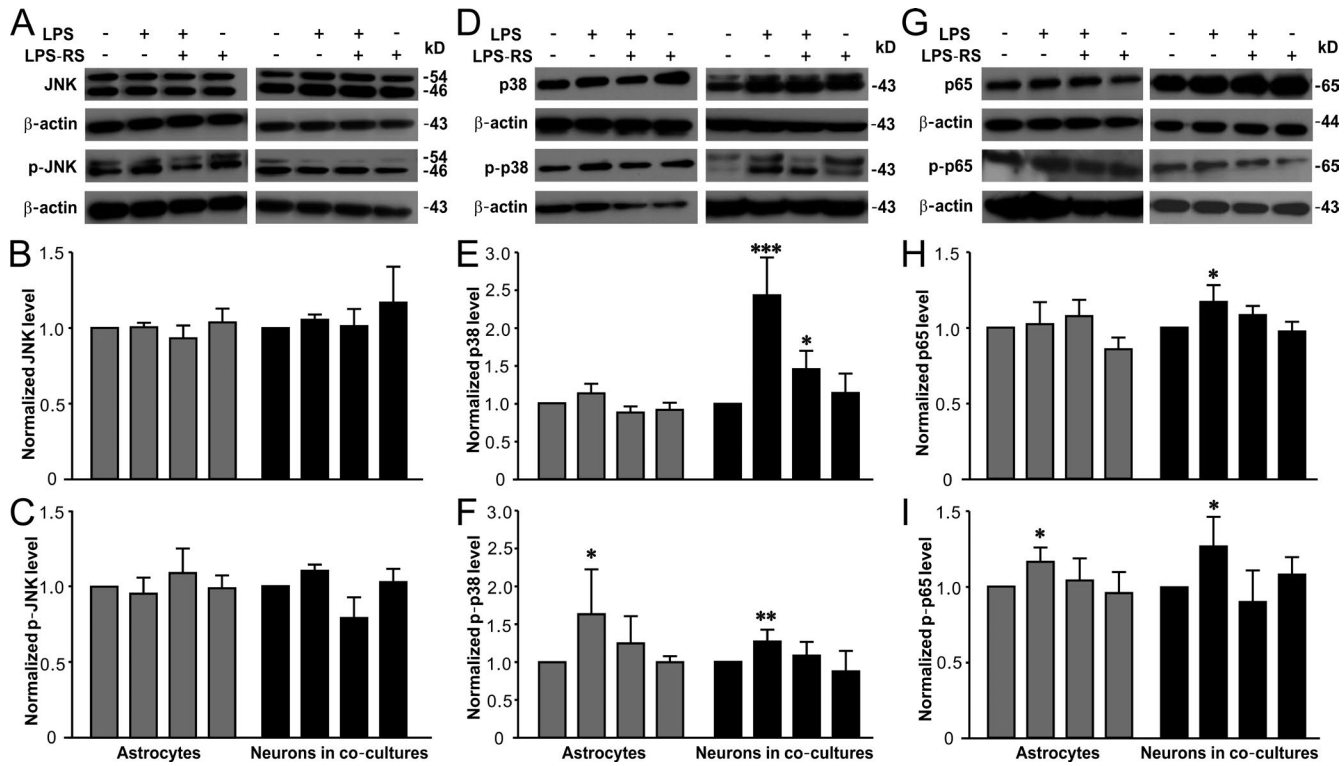

Figure S4. **Effect of LPS on MAPK and NF- $\kappa$ B expressions in cultured astrocytes and neurons co-cultured with astrocytes.** Representative Western blots of JNK/p-JNK (A) and quantification of relative expression of JNK (B) and p-JNK (C) showing LPS did not alter JNK and p-JNK levels in astrocytes and neurons.  $n = 3$  for each group. Representative Western blots of p38/p-p38 (D) and quantification of relative expression of p38 (E) and p-p38 (F) showing LPS increased p-p38 but not p38 expression in astrocytes and increased both p38 and p-p38 in neurons.  $n = 5$  for each group. Representative Western blots of p65/p-p65 (G) and quantification of relative expression of p65 (H) and p-p65 (I) showing LPS increased p-p65 but not p65 expression in astrocytes and increased both p65 and p-p65 in neurons (H and I).  $n = 4$  for each group. \*,  $P < 0.05$ ; \*\*,  $P < 0.01$ ; \*\*\*,  $P < 0.001$  (one-way ANOVA). Data are mean  $\pm$  SEM.

Table S1. **Effect of LPS on synaptogenesis and dendritic branching in WT astrocyte co-cultured hippocampal neurons (DIV15) derived from *TLR4*<sup>-/-</sup> and their WT and *TLR4*<sup>+/-</sup> littermate mice**

| Mouse                               | PSD95 puncta                | PSD95/synaptophysin colocalized puncta | Total length of dendrites        | Total number of branching   |
|-------------------------------------|-----------------------------|----------------------------------------|----------------------------------|-----------------------------|
| WT neuron-C                         | 59.4 $\pm$ 3.5              | 23.8 $\pm$ 2.4                         | 1,066.5 $\pm$ 66.3               | 19.4 $\pm$ 1.2              |
| WT neuron-L                         | 75.2 $\pm$ 5.8 <sup>a</sup> | 33.1 $\pm$ 2.9 <sup>a</sup>            | 1,467.1 $\pm$ 97.5 <sup>b</sup>  | 23.3 $\pm$ 1.1 <sup>a</sup> |
| <i>TLR4</i> <sup>+/-</sup> neuron-C | 55.9 $\pm$ 4.2              | 26.7 $\pm$ 3.7                         | 1,107.5 $\pm$ 76.3               | 18.3 $\pm$ 1.3              |
| <i>TLR4</i> <sup>+/-</sup> neuron-L | 68.4 $\pm$ 3.7 <sup>a</sup> | 38.3 $\pm$ 3.8 <sup>a</sup>            | 1,505.6 $\pm$ 132.7 <sup>a</sup> | 23.1 $\pm$ 1.2 <sup>b</sup> |
| <i>TLR4</i> <sup>-/-</sup> neuron-C | 56.7 $\pm$ 2.8              | 23.4 $\pm$ 2.4                         | 1,044.5 $\pm$ 109.0              | 18.0 $\pm$ 1.6              |
| <i>TLR4</i> <sup>-/-</sup> neuron-L | 65.7 $\pm$ 2.9 <sup>a</sup> | 33.7 $\pm$ 3.2 <sup>a</sup>            | 1,073.7 $\pm$ 102.3 <sup>b</sup> | 23.5 $\pm$ 1.6 <sup>a</sup> |

The number of puncta was counted per 100- $\mu$ m length of dendrites.  $n = 30$  for each group. Data are mean  $\pm$  SEM. C, control; L, LPS.

<sup>a</sup> $P < 0.05$  ( $t$  test).

<sup>b</sup> $P < 0.01$  ( $t$  test).
